# Supplementary material for: Effect of acid distribution and pore structure of ZSM-5 on catalytic performance
Source: Royal Society of Chemistry journal article supplement (doi:10.1039/d2re00065b), 2022-01-01

## Supplemental Information

**TableS1** Sample crystallinity and yield

| Catalysts | Relative crystallinity (%) | Yield <sup>a</sup> (%) |
|-----------|----------------------------|------------------------|
| HZ-5      | 86                         | 72                     |
| N-HZ-5    | 68                         | 56                     |
| T-HZ-5    | 100                        | 100                    |

a)  $M_a/M$ ,  $M_a$  was the mass after treatment,  $M$  was the mass before treatment.

**TableS2** Textural properties of the catalysts

| Catalysts | $S_{BET}$<br>( $m^2/g$ ) <sup>a</sup> | $S_{micro}$<br>( $m^2/g$ ) <sup>b</sup> | $V_{total}$<br>( $cm^3/g$ ) <sup>b</sup> | $V_{micro}$<br>( $cm^3/g$ ) <sup>b</sup> |
|-----------|---------------------------------------|-----------------------------------------|------------------------------------------|------------------------------------------|
| HZ-5      | 442                                   | 390                                     | 0.22                                     | 0.14                                     |
| N-HZ-5    | 384                                   | 257                                     | 0.42                                     | 0.10                                     |
| T-HZ-5    | 443                                   | 372                                     | 0.32                                     | 0.14                                     |

a) BET method; b) t-plot method

**TableS3** Si/Al ratio on sample surface

| Catalysts | Si/Al |
|-----------|-------|
| HZ-5      | 26    |
| N-HZ-5    | 21    |
| T-HZ-5    | 30    |

**TableS4** Assignment and relative intensities of the peaks in the  $^{27}Al$  MAS NMR spectra of samples

| $\delta$<br>[ppm] | Relative peak are <sup>a</sup> [-] |        |        |
|-------------------|------------------------------------|--------|--------|
|                   | HZ-5                               | N-HZ-5 | T-HZ-5 |
| 48                | 0.085                              | 0.077  | 0.061  |
| 55                | 1                                  | 1      | 1      |

a) Normalized to intensity of peak at 55 ppm

**TableS5** Assignment and relative intensities of the peaks in the  $^{29}Si$  MAS NMR spectra of samples

| $\delta$<br>[ppm] | Si site                             | Relative peak are <sup>a</sup> [-] |        |        |
|-------------------|-------------------------------------|------------------------------------|--------|--------|
|                   |                                     | HZ-5                               | N-HZ-5 | T-HZ-5 |
| -103              | Si(OSi) <sub>3</sub> OH             | 0.062                              | 0.040  | 0.019  |
| -106              | Si(OSi) <sub>3</sub> Al             | 0.055                              | 0.055  | 0.026  |
| -108              | T <sub>1</sub> Si(OSi) <sub>4</sub> | 0.157                              | 0.119  | 0.113  |
| -112              | T <sub>2</sub> Si(OSi) <sub>4</sub> | 0.635                              | 0.325  | 0.458  |
| -113              | T <sub>3</sub> Si(OSi) <sub>4</sub> | 1.000                              | 1.000  | 1.000  |
| -116              | T <sub>4</sub> Si(OSi) <sub>4</sub> | 0.347                              | 0.289  | 0.306  |

a) Normalized to intensity of peak at -113 ppm

**FigS1** Partial enlarged view of pore size distribution of samples

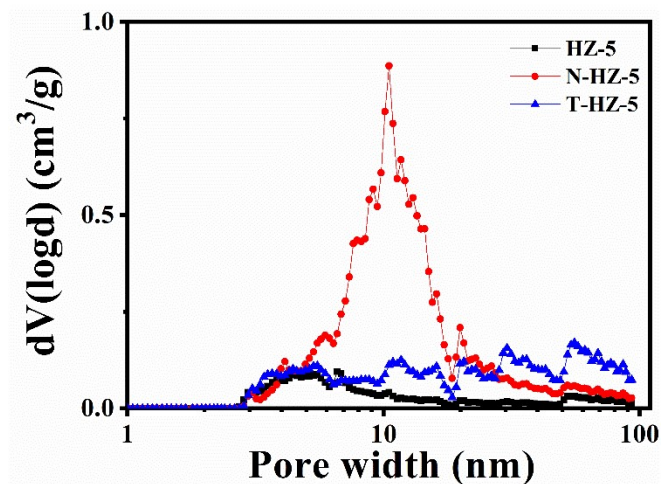

**FigS2** FT-IR spectra in the hydroxyl range of sample

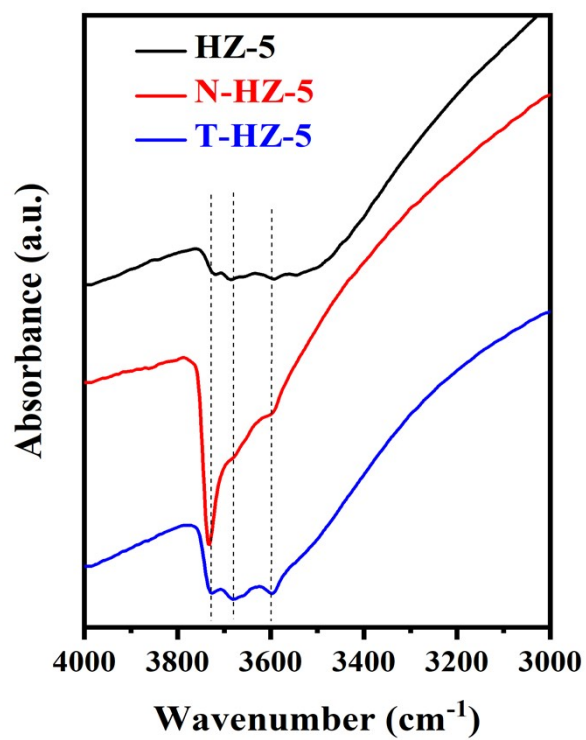

**FigS3** TG curve after sample inactivation, Reaction conditions: Temperature 773 K, H<sub>2</sub>O/CH<sub>3</sub>OH molar ratio 1, methanol WHSV=3h<sup>-1</sup>

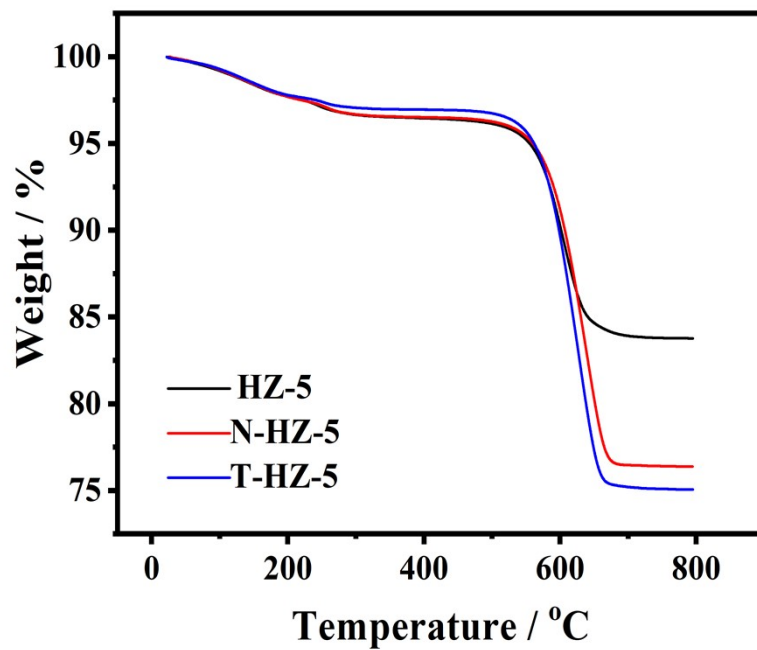

Supplement: d2re00065b1.pdf [file d2re00065b1.pdf]
